# Supplementary material
Source: PubMed Central journal article supplement (PMC2892110)

## Supplemental Data

### A Eukaryotic-like Ser/Thr Kinase

### Signals Bacteria to Exit Dormancy

### in Response to Peptidoglycan Fragments

Ishita M. Shah, Maria-Halima Laaberki, David L. Popham, Jonathan Dworkin

### Supplemental Experimental Procedures

#### Reagents

Bryostatin and staurosporine were obtained from Calbiochem and Sigma, respectively. Muramyl-dipeptide was obtained from Sigma and tripeptide (Ala-Glu-Dpm) was obtained from Anaspec.

#### General Methods

*B. anthracis* Sterne spores were generated by growing cells for 4 days in modified G medium followed by repeated washing with dH<sub>2</sub>O and storage at 4°C.

#### Antibiotic Sensitivity

*B. subtilis* wild type spores were incubated with non-germinant buffer, mucopeptide (GlcNAc-MurNAc tripeptide, 40 μM), *B. subtilis* cell free supernatant, or bryostatin (1 μM), for 60 min at 37°C prior to treatment with tetracycline (10 μg/ml for 60 min at 37°C). Percent loss in plating efficiency was calculated relative to that observed in the absence of germinant

#### Plasmid Construction

**pIMS36 (His<sub>6</sub>-Yycl):** Sequence corresponding to codons 31-280 (nt 93-840) of *yycI* was amplified from *B. subtilis* genomic DNA using primers that included six codons coding for histidine residues after the start codon. The resulting PCR product was digested with *NcoI* and *XbaI* and ligated to pBAD24 digested with *NcoI* and *XbaI*.

**pIMS40 (His<sub>6</sub>-PASTA<sub>(BS)</sub>):** Sequence corresponding to codons 357-648 (nt 1071-1944) of *prkC* was amplified from *B. subtilis* genomic DNA using primers that included six codons coding for histidine residues after the start codon. The resulting PCR product was digested with *NcoI* and *XbaI* and ligated to pBAD24 digested with *NcoI* and *XbaI*.

**pIMS41 (His<sub>6</sub>-PrkC):** Full length *prkC* was amplified from *B. subtilis* PY79 genomic DNA using primers that included the native *prkC* RBS followed by six codons coding for histidine residues after the start codon. The resulting PCR product was digested with *SpeI* and *SphI* and the digested product was ligated to pDR111 digested with *NheI* and *SphI*.

**pIMS42 (His<sub>6</sub>-AcmA):** Sequence corresponding to codons 243-439 of *acmA* was amplified from *L. lactis* genomic DNA (kind gift from M. Belfort) using primers that included six codons coding for histidine residues after the start codon. The resulting PCR product was digested with *NcoI* and *XbaI* and ligated to pBAD24 digested with *NcoI* and *XbaI*.

**pIMS44(His<sub>6</sub>-PASTA<sub>(sa)</sub>):** Sequence corresponding to codons 378-644 of S\_TPK was amplified from *S. aureus* NEWMAN genomic DNA using primers that included six codons coding for histidine residues after the start codon. The resulting PCR product was digested with *NcoI* and *XbaI* and ligated to pBAD24 digested with *NcoI* and *XbaI*.

**pIMS46 (His<sub>6</sub>-PrkC<sub>sa</sub>):** The gene encoding S\_TKc was amplified from *S. aureus* NEWMAN genomic DNA using primers that included the *B. subtilis* *prkC* RBS followed by six codons coding for histidine residues after the start codon. The resulting PCR product was digested with *NheI* and *SphI* and the digested product was ligated to pDR111 digested with *NheI* and *SphI*.

**pIMS47 (FLAG-PrkC<sub>Bs</sub>):** Full length *prkC* was amplified from *B. subtilis* genomic DNA from strain PY79 using primers that included the native *prkC* RBS followed by codons coding for FLAG tag after the start codon. The resulting PCR product was digested with *SpeI* and *SphI* and the digested product was ligated to pDR111 digested with *NheI* and *SphI*.

**pIMS48 (FLAG-PrkC<sub>Bs(K40A)</sub>):** pIMS47 was subjected to site-directed mutagenesis with primers to substitute lysine at position 40 with an alanine. PCR products resulting from the 5' FLAG-*prkC* primer and (K40A) reverse primer as well as from K40A forward primer and 3' *prkC* primer were gel-purified and used as templates for PCR-SOEing using 5'FLAG-*prkC* and 3' *prkC* primers. The resulting PCR product was digested with *SpeI* and *SphI* and the digested product was ligated to pDR111 digested with *NheI* and *SphI*.

### Strain Construction

**JDB1980 ( $\Delta prkC$  amyE::P<sub>spac</sub>-his6-*prkC*<sub>Bs</sub>):** PB705 was transformed with pIMS41, selecting for Spec<sup>R</sup> and screening for amy-.

**JDB2226 ( $\Delta prkC$  amyE::P<sub>spac</sub>-FLAG-*prkC*<sub>Bs</sub>):** PB705 was transformed with pIMS47, selecting for Spec<sup>R</sup> and screening for amy-.

**JDB2227 ( $\Delta prkC$  amyE::P<sub>spac</sub>-FLAG-*prkC*<sub>Bs(K40A)</sub>):** PB705 was transformed with pIMS48, selecting for Spec<sup>R</sup> and screening for amy-.

**JDB2017 ( $\Delta prkC$  amyE::P<sub>spac</sub>-his<sub>6</sub>-*prkC*<sub>sa</sub>):** PB705 was transformed with pIMS46, selecting for spec<sup>R</sup> and screening for amy-.

**JDB1930 (*B. anthracis*  $\Delta$ *prkC*):** We used the temperature sensitive plasmid pKS1 (Shatalin and Neyfakh, 2005) to construct a deletion mutation ( $\Delta$ *prkC::aphA3*). We introduced a Kan<sup>R</sup> cassette into the *bas3713* gene that had been amplified from *B. anthracis* Sterne 34F2 strain genomic DNA. This construct was then introduced into pKS1, and the resulting plasmid (pML280) was transformed into *B. subtilis* PY79. A midiprep of the plasmid amplified in *B. subtilis* was used to electroporate *B. anthracis* Sterne. We grew this strain at 37°C without antibiotic and then selected for the integration of the pML280 plasmid into the *B. anthracis* chromosome using antibiotic selection (kanamycin, 10µg/ml) followed by PCR screening for the insertion in the correct locus. After a cycle at a permissive temperature (30°C) with antibiotic, we selected for the excision of the plasmid (loss of the erythromycin resistance) and the insertion of the antibiotic cassette in the *prkC* gene using antibiotic selection and a PCR screen using flanking primers of the locus.

## Figure Legends

**Figure S1. Phase Contrast Images of Cells Exposed to Germinants.** Wild type PY79 spores (wt), FB85 spores lacking all five nutrient germination receptors ( $\Delta ger5$ ) or PB705 spores lacking PrkC ( $\Delta prkC$ ) were incubated with germination buffer alone or with 10 mM L-alanine (Alanine); 1  $\mu$ g/ml *B. subtilis* peptidoglycan (PG), or *B. subtilis* cell free supernatant (CFS,  $10^{-3}$  dilution) for 60 min and 100X phase contrast images were subsequently acquired.

**Figure S2. Kinetics of Germination.** Wild type PY79 spores were incubated with germination buffer alone or with germination buffer containing 1 mM L-alanine (red) or cell free supernatant (blue) for times indicated and the percentage of heat sensitive (80°C, 20 min) spores was determined.

**Figure S3. Effect of Cell Free Supernatant Isolated from Non-growing Cells.** *B. subtilis* cells were grown up to an  $A_{600}$  of 1.2, washed and transferred to non-growth promoting buffer (Tbase/10 mM  $MgSO_4$ ) and incubated for 24 hours. Filtrate, referred to as CFS(NG) was subsequently isolated and used in a germination assay as described in Experimental Procedures along with L-alanine (1 mM) and cell-free supernatant (CFS) prepared as described in Experimental Procedures as controls. % Germination is shown.

**Figure S4. Effect of Cortex PG on Spore Germination.** PG from decoated spores was obtained as described in Experimental Procedures for vegetative PG by boiling in 4% SDS and washing extensively with  $dH_2O$ . The resulting suspension was used at indicated concentrations in a germination assay. % germination is shown.

**Figure S5. Effect of  $\Delta prkC$  Mutation on  $Ca^{2+}$ -DPA Spore Germination.** Wild type PY79 and PB705  $\Delta prkC$  *B. subtilis* spores were incubated with 1 mM L-alanine, 100  $\mu$ g/ml PG, or 50 mM  $Ca^{2+}$ -DPA (Sigma) for 60 min and % germination was determined.

**Figure S6. Effect of  $\Delta prkC$  Mutation on *B. anthracis* Spore Germination.** *B. anthracis* Sterne wild type or JDB1930 ( $\Delta prkC$ ) spores were incubated in the presence of 100  $\mu$ g/ml of *B. anthracis* peptidoglycan (black) and % germination was determined. Error bars represent SD for triplicate samples.

**Figure S7. Complementation of  $\Delta prkC_{K40A}$  Mutation.** Spores generated from strains JDB3 (PY79, wild type), PB705 ( $\Delta prkC$ ) JDB2227 ( $\Delta prkC amyE::P_{spac}$ -FLAG- $prkC_{Bs}$ ) and JDB2228 ( $\Delta prkC amyE::P_{spac}$ -FLAG- $prkC_{Bs(K40A)}$ ) were exposed to 1 mM L-alanine (ala), 100  $\mu$ g/ml PG (PG) or 20  $\mu$ M disaccharide tripeptide (tri) for 60 min prior to measuring % germination.

**Figure S8. Spore Fractionation.** JDB2228 ( $\Delta prkC amyE::P_{spac}$ -FLAG- $prkC_{Bs(K40A)}$ ), JDB1568 (*cotE-gfp*), and JDB1700 ( $P_{spank}$ -*gfp*) spores were fractionated according to the protocol described for the localization for FLAG-PrkC. Detection of Flag-PrkC<sub>(K40A)</sub> in

the P100 fraction (IM) using  $\alpha$ -FLAG antibodies, CotE-GFP in the coat fraction (C ) and GFP in the S100 fraction (S) by  $\alpha$ -GFP antibodies (kind gift from H. Shuman) is shown.

**Figure S9. Germination by *S. aureus* Cell-free Supernatant.** JDB1980 ( $\Delta prkC$  *amyE*::P<sub>spac</sub>-his<sub>6</sub>-*prkC*<sub>BS</sub>; red) or JDB2017 ( $\Delta prkC$  *amyE*::P<sub>spac</sub>-his<sub>6</sub>-*prkC*<sub>Sa</sub>; black) spores were incubated with *S. aureus* cell-free supernatant at a series of dilutions. Error bars represent SD for triplicate samples.

**Table S1. Bacterial strains.**

| Strain                            | Genotype                                                                                                                                                                 | Source                        |
|-----------------------------------|--------------------------------------------------------------------------------------------------------------------------------------------------------------------------|-------------------------------|
| PY79                              | Wild type                                                                                                                                                                | Lab collection                |
| EB1451                            | <i>hisA1 argC4 metC3 tagO::erm</i>                                                                                                                                       | (D'Elia et al., 2006)         |
| PB705                             | <i>trpC2 prkCΔ1</i>                                                                                                                                                      | (Gaidenko et al., 2002)       |
| FB85                              | <i>ΔgerA::spc ΔgerB::cat ΔgerK::erm ΔyndDEF::tet ΔyfkQRT::neo</i>                                                                                                        | (Paidhungat and Setlow, 2000) |
| JDB1930                           | <i>B. anthracis</i> Sterne <i>ΔprkC</i>                                                                                                                                  | This study                    |
| JDB1980                           | <i>ΔprkCΔ1 amyE::P<sub>spac</sub>-his<sub>6</sub>-prkC<sub>Bs</sub></i>                                                                                                  | This study                    |
| JDB2017                           | <i>ΔprkCΔ1 amyE::P<sub>spac</sub>-his<sub>6</sub>-prkC<sub>Sa</sub></i>                                                                                                  | This study                    |
| JDB2226                           | <i>ΔprkCΔ1 amyE::P<sub>spac</sub>-FLAG-prkC<sub>Bs</sub></i>                                                                                                             | This study                    |
| JDB2227                           | <i>ΔprkCΔ1 amyE::P<sub>spac</sub>-FLAG-prkC<sub>Bs(K40A)</sub></i>                                                                                                       | This study                    |
| <i>B. anthracis</i> Sterne 34F2   | Wild type                                                                                                                                                                | Lab collection                |
| <i>B. megaterium</i> MS021        | <i>ΔbgaR/bgaM</i>                                                                                                                                                        | Lab collection                |
| <i>C. acetobutylicum</i> NCTC 619 | Wild type                                                                                                                                                                | ATCC #4259                    |
| <i>B. sphaericus</i> 2362         | Wild type                                                                                                                                                                | Lab collection                |
| <i>L. innocua</i>                 | Wild type                                                                                                                                                                | D. Portnoy                    |
| <i>E. coli</i> DH5α               | <i>hsdR17(r<sub>K</sub><sup>-</sup>m<sub>K</sub><sup>+</sup>) supE44 thi recA1 gyrA (Nal<sup>I</sup>) relA1 D(lacI ZYA-argF)U169 deo<sup>R</sup> (F80ΔlacD(lacZ)M15)</i> | Lab collection                |
| <i>S. aureus</i> Newman           | Wild type                                                                                                                                                                | F. Lowy                       |
| <i>E. faecalis</i> OG1RF          | Wild type                                                                                                                                                                | D. Garsin                     |
| <i>S. pyogenes</i>                | Wild type                                                                                                                                                                | A. Ratner                     |
| <i>L. casei</i>                   | Wild type                                                                                                                                                                | A. Ratner                     |

**Table S2. Stimulation of germination makes spores sensitive to an antibiotic**

| <b>Germinant</b>      | <b>% loss in viable cells</b> |
|-----------------------|-------------------------------|
| None                  | <b>0</b>                      |
| Muropeptide           | <b>72 ± 3</b>                 |
| Cell free supernatant | <b>45 ± 2</b>                 |
| Bryostatin            | <b>32 ± 7</b>                 |

*B. subtilis* wild type spores were incubated with non-germinant buffer, muropeptide (GlcNAc-MurNAc tripeptide, 40  $\mu$ M), *B. subtilis* cell free supernatant, or bryostatin (1  $\mu$ M), for 60 min at 37°C prior to treatment with tetracycline (10  $\mu$ g/ml for 60 min at 37°C).

Percent loss in plating efficiency was calculated relative to that observed in the absence of germinant.

## Supplemental References

D'Elia, M.A., Millar, K.E., Beveridge, T.J., and Brown, E.D. (2006). Wall teichoic acid polymers are dispensable for cell viability in *Bacillus subtilis*. *J Bacteriol* 188, 8313-8316.

Gaidenko, T.A., Kim, T.J., and Price, C.W. (2002). The PrpC serine-threonine phosphatase and PrkC kinase have opposing physiological roles in stationary-phase *Bacillus subtilis* cells. *J Bacteriol* 184, 6109-6114.

Paidhungat, M., and Setlow, P. (2000). Role of ger proteins in nutrient and nonnutrient triggering of spore germination in *Bacillus subtilis*. *J Bacteriol* 182, 2513-2519.

Shatalin, K.Y., and Neyfakh, A.A. (2005). Efficient gene inactivation in *Bacillus anthracis*. *FEMS Microbiol Lett* 245, 315-319.



Figure S1

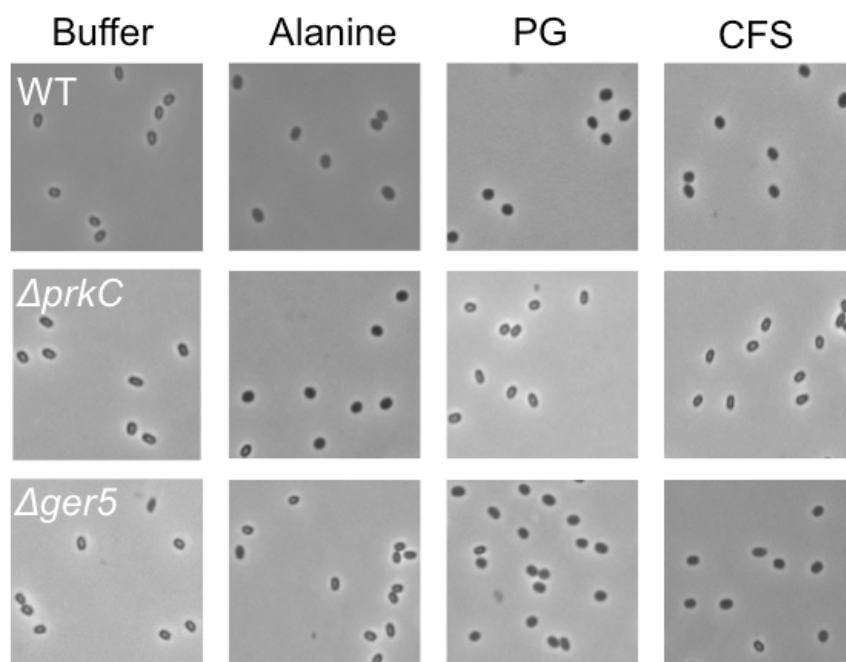

Figure S2

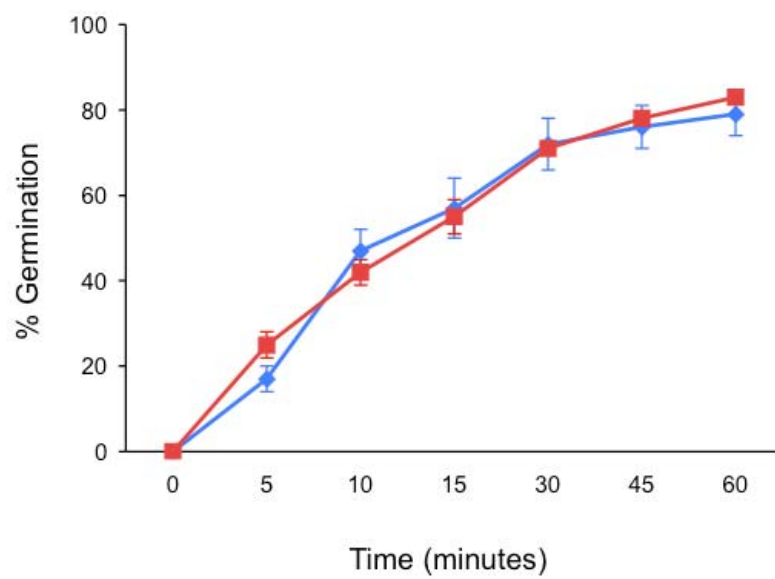

Figure S3

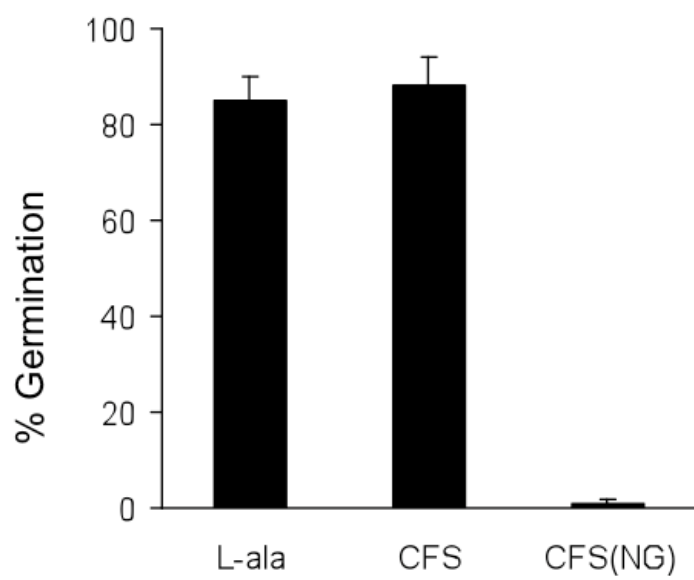

Figure S4

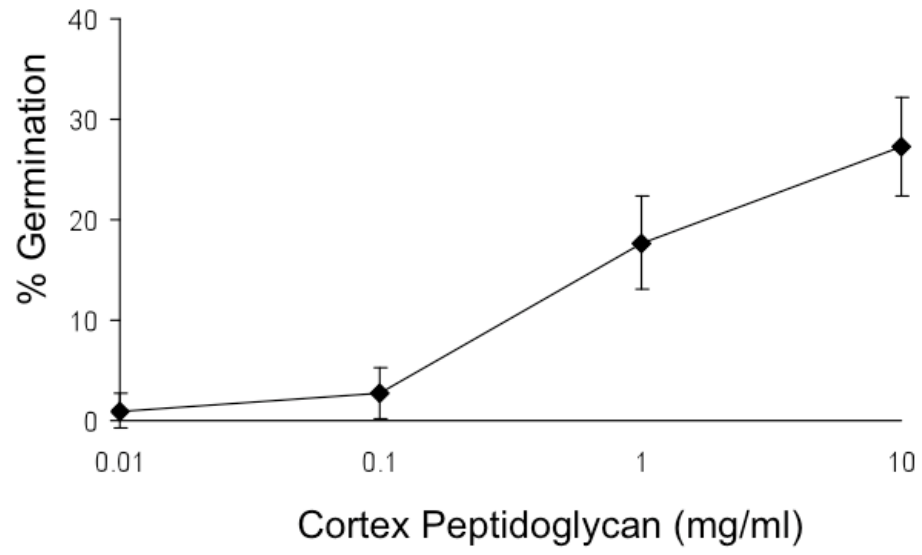

Figure S5

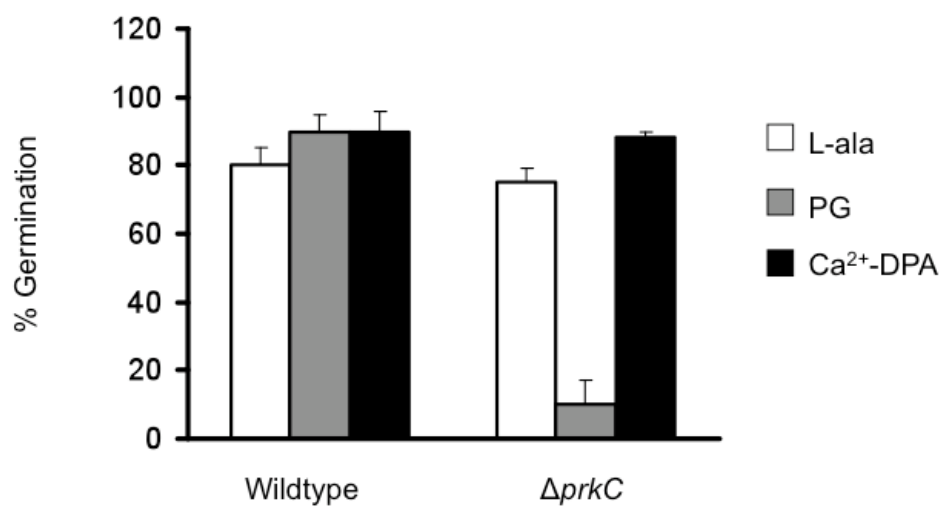

Figure S6

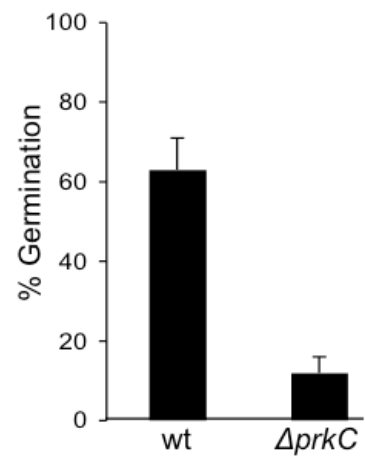

Figure S7

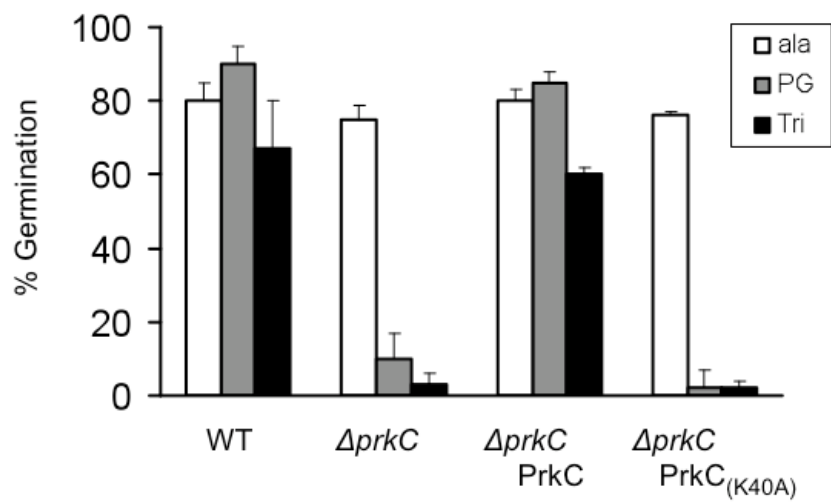

Figure S8

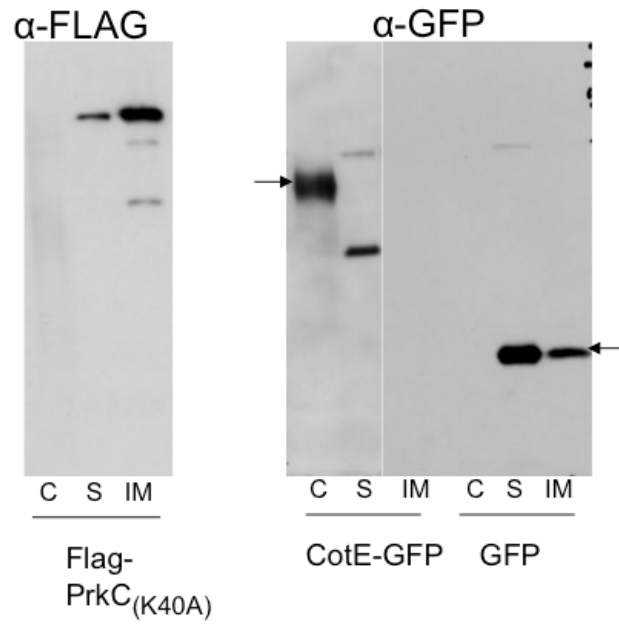



Figure S9

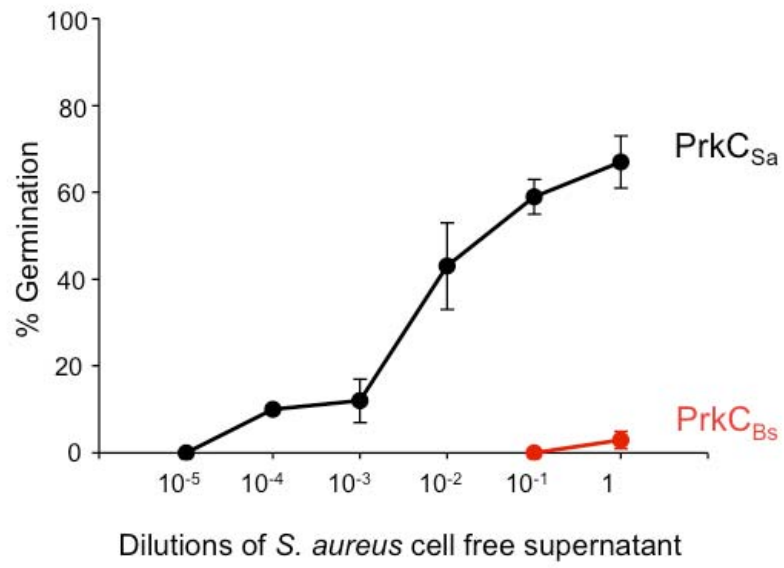

Supplement: NIHMS101642-supplement-supplement_1.pdf [file NIHMS101642-supplement-supplement_1.pdf]
